# Supplementary material
Source: publisher site journal article supplement (https://www.degruyter.com/publication/journal_key/MED/downloadAsset/MED_CFP%20Clinical%20and%20Research%20value%20of%20Cancer%20Stem%20Cells.pdf)
Supplement: Supplementary file 1 [file MED_CFP%20Clinical%20and%20Research%20value%20of%20Cancer%20Stem%20Cells.pdf]

# CLINICAL AND RESEARCH VALUE OF CANCER STEM CELLS

## GUEST EDITORS

---

Ira Skvortsova, University of Innsbruck, Austria

Kehan Ren, Vascular Biology Center, Augusta University, Georgia, USA

## DESCRIPTION

---

Cancer stem-like cells (CSCs) are a small population of tumor cells that are capable of self-renewal and producing heterogeneous lineages of cancer cells that comprise the tumor. CSCs are a unique biological subpopulation of cancer cells that could survive indeterminately. Those cells are characterized by the expression of gene sets associated with embryonic stem cells, the activation of multidrug resistance (MDR) and/or DNA-damage response (DDR) systems. Therefore, CSCs are believed to be associated with tumor relapse, metastasis and resistance to treatment.

The research on Cancer Stem-like cells vary from in vitro studies to clinical trials. This special issue spans CSCs biology, characterization and clinical value in all types of malignancy. We look forward to contributions from researchers worldwide. We welcome reviews, research articles, case reports, letters to editor.

## HOW TO SUBMIT

---

Please contact the **Managing Editor** ([Magdalena.Wierzchowiecka@degruyter.com](mailto:Magdalena.Wierzchowiecka@degruyter.com)) and the **Guest Editors** in cc (Prof. Dr. Ira Skvortsova [Ira.Skvortsova@i-med.ac.at](mailto:Ira.Skvortsova@i-med.ac.at) and Dr. Kehan Ren [KREN@augusta.edu](mailto:KREN@augusta.edu)) to inform that you are going to submit a paper to the Topical Issue.
